# Supplementary material
Source: PubMed Central journal article supplement (PMC7520079)
Supplement: NIHMS1600976-supplement-Supporting_Information.pdf [file NIHMS1600976-supplement-Supporting_Information.pdf]

# Supporting Information

## The alphabet projection of spectra

Patrick A. Kreitzberg,<sup>†</sup> Marshall Bern,<sup>‡</sup> Qingbo Shu,<sup>¶</sup> Fuquan Yang,<sup>§</sup> and Oliver

Serang<sup>\*,†</sup>

<sup>†</sup>*Department of Computer Science, University of Montana, Missoula, MT, USA*

<sup>‡</sup>*Protein Metrics Inc., Cupertino, CA, USA*

<sup>¶</sup>*Biodesign Institute, Arizona State University, Tempe, AZ, USA*

<sup>§</sup>*Institute of Biophysics, Chinese Academy of Sciences, Beijing, China*

E-mail: oliver.serang.@umontana.edu

### Supporting Information Available

The following files are available free of charge.

- S-1 Zip file of source code; organized as follows:
  - /data/ directory includes both datasets used in paper.
  - /src/mcmc/ directory includes source code for the Gibbs sampler method used and a README.txt with instructions.
  - /src/annotate-spectra directory includes code for a *de novo* sequencing script written in Python 2.7 which was used to create figures in the paper.
  - /src/elemental-decomposition directory includes source code for an elemental decomposition script written in C++.
